# Supplementary material for: Correlation between 5-HTTLPR gene polymorphism and cognitive function of traumatic stress in Chinese Han children
Source: PubMed Central journal article supplement — Transl Pediatr. 2022 Jul;11(7):1251–60. doi: 10.21037/tp-22-289 (PMC9360820; doi:10.21037/tp-22-289), 2022-07
Supplement: tp-11-07-1251-dss.pdf [file tp-11-07-1251-dss.pdf]

## Data Sharing Statement

|                     |                                                                                                                                                     |                                                                                                  |
|---------------------|-----------------------------------------------------------------------------------------------------------------------------------------------------|--------------------------------------------------------------------------------------------------|
| <b>Article Info</b> | <a href="https://dx.doi.org/10.21037/tp-22-289">https://dx.doi.org/10.21037/tp-22-289</a>                                                           |                                                                                                  |
| <b>Item</b>         | <b>Question</b>                                                                                                                                     | <b>Authors' Response<br/>(place "-" if not applicable)</b>                                       |
| 1                   | Would you like to share data collected for your study to others?                                                                                    | Yes                                                                                              |
| 2                   | If not, would you like to share the reason for your decision?                                                                                       | -                                                                                                |
| 3                   | What data in particular will be shared?                                                                                                             | Clinical data of 60 children with post-traumatic stress disorder and 60 healthy control children |
| 4                   | Any other documents will be shared? Such as study protocol, statistical analysis plan, informed consent form, clinical study report, analytic code. | NO!                                                                                              |
| 5                   | When will data availability begin?                                                                                                                  | Since the publication                                                                            |
| 6                   | When will data availability end?                                                                                                                    | Within a year                                                                                    |
| 7                   | To whom will you share the data?                                                                                                                    | Colleagues or researchers                                                                        |
| 8                   | For what type of analysis or purpose?                                                                                                               | Just for research                                                                                |
| 9                   | How or where can the data/documents be obtained?                                                                                                    | Emails could be sent to the address below to obtain the shared data:<br>chenhdan13@163.com       |
| 10                  | Any other restrictions?                                                                                                                             | -                                                                                                |
